# Supplementary material for: A Meta-Analysis of the Metabolic Syndrome Prevalence in the Global HIV-Infected Population
Source: PubMed Central journal article supplement (PMC4805252; doi:10.1371/journal.pone.0150970), 2016-03-23
Supplement: pone.0150970.s006.pdf [file pone.0150970.s006.pdf]

**S3 Table. Different criteria for clinical diagnosis of the metabolic syndrome**

| Clinical measure      | WHO (1998) [1]                                                                       | EGIR (1999) [2]                                                              | ATP III (2001) [3]                                               | AACE (2003) [4]                                                    | Modified ATP III (2004) [5]                                      | IDF (2005) [6]                                                                       | NCEP-ATPIII (2005) [7]                                                               | JIS (2009) [8]                                                                            |
|-----------------------|--------------------------------------------------------------------------------------|------------------------------------------------------------------------------|------------------------------------------------------------------|--------------------------------------------------------------------|------------------------------------------------------------------|--------------------------------------------------------------------------------------|--------------------------------------------------------------------------------------|-------------------------------------------------------------------------------------------|
| 1. Insulin resistance | IGT, IFG, T2DM, or low insulin sensitivity <sup>a</sup> plus any 2 of the following: | Plasma insulin >75 <sup>th</sup> percentile plus any 2 of following features | None, but any 3 of the following:                                | IGT or IFG plus any of the following based on clinical assessment: | None, but any 3 of 5 the following:                              | None                                                                                 | None, but any 3 of the following:                                                    | None, but any 3 of the following:                                                         |
| 2. Body composition   | WHR >0.90 in men, >0.85 in women and/or BMI >30 kg/m <sup>2</sup>                    | WC ≥94 cm in men, ≥80 cm in women                                            | WC ≥102 cm in men, ≥88 cm in women                               | BMI ≥25 kg/m <sup>2</sup>                                          | WC ≥102 cm in men, ≥88 cm in women                               | Increased WC >94 cm in men, ≥80 cm in women plus any 2 of the following:             | WC ≥102 cm in men, ≥88 cm in women                                                   | Population-and country-specific definitions <sup>c</sup>                                  |
| 3. Lipids             | TG ≥ 1.7 mmol/L and/or HDL-C <0.9 mmol/L in men, <1 mmol/L in women                  | TG ≥2.0 mmol/L and/or HDL-C <1.01 mmol/L or treated for dyslipidemia         | TG ≥1.69 mmol/L, HDL-C <1.03 mmol/L in men, <1.3 mmol/L in women | TG ≥1.7 mmol/L and HDL-C <1 mmol/L                                 | TG ≥1.69 mmol/L; HDL-C <1.03 mmol/L in men, <1.3 mmol/L in women | TG ≥1.7 mmol/L or TG Rx; HDL-C <1.03 mmol/L in men, <1.3 mmol/L in women or HDL-C Rx | TG ≥1.7 mmol/L or on TG Rx; HDL-C <1 mmol/L in men, <1.3 mmol/L in women or HDL-C Rx | TG ≥ 1.7 mmol/L or on TG Rx; HDL-C < 1.03 mmol/L in men, <1.3 mmol/L in women or HDL-C Rx |
| 4. Blood pressure     | SBP/DBP ≥160/90 mmHg                                                                 | SBP/DBP ≥140/90 mmHg or hypertension Rx                                      | SBP/DBP ≥130/85 mmHg                                             | SBP/DBP ≥130/85 mmHg                                               | SBP/DBP ≥130/85 mmHg                                             | SBP/DBP ≥130/85 mmHg or hypertension Rx                                              | SBP/DBP ≥130/85 mmHg or hypertension Rx                                              | SBP/DBP ≥130/85 mmHg or hypertension Rx                                                   |
| 5. Glucose metabolism | IGT, IFG, or T2DM                                                                    | IGT or IFG (but not diabetes)                                                | >6.11 mmol/L (includes diabetes)                                 | IGT or IFG (but not diabetes)                                      | >5.6 mmol/L (includes diabetes)                                  | ≥5.6 mmol/L (includes diabetes)                                                      | ≥ 5.6 mmol/L or on hyperglycemic Rx                                                  | ≥ 5.6 mmol/L or on hyperglycemic Rx                                                       |
| 6. Other              | mALB                                                                                 |                                                                              |                                                                  | Other features of Ins-R <sup>b</sup>                               |                                                                  |                                                                                      |                                                                                      |                                                                                           |

AACE; American Association of Clinical Endocrinologists; ATP III, Adults Treatment Panel III; BMI, body mass index; DBP, diastolic blood pressure; EGIR, European Group for the Study of Insulin Resistance; HDL-C, high density lipoprotein cholesterol; IDF, International Diabetes Federation; IGT indicates impaired glucose tolerance; IFG, impaired fasting glucose; Ins-R, Insulin resistance; JIS, Joint Interim Statement; NCEP-ATPIII, National Cholesterol Education Program, Adults Treatment Panel III; mALB, micro albumin; Rx, prescription; SBP, systolic blood pressure; TG, triglycerides; T2DM indicates type 2 diabetes mellitus; WC, waist circumference; WHR, waist-to-hip ratio; WHO, World Health Organisation

<sup>a</sup> Insulin sensitivity measured under hyperinsulinaemic euglycaemic conditions; glucose uptake below lowest quartile for background population under investigation.

<sup>b</sup> Includes family history of T2DM mellitus, sedentary lifestyle, advancing age, and ethnic groups susceptible to T2DM

<sup>c</sup> European, Middle East, Mediterranean, sub-Saharan African: WC ≥94 cm in men, ≥80 cm in women; Asian, Ethnic Central and South America: WC ≥90 cm in men, ≥80 cm in women

## References

1. Alberti KG, Zimmet PZ. Definition, diagnosis and classification of diabetes mellitus and its complications. Part 1: diagnosis and classification of diabetes mellitus provisional report of a WHO consultation. *Diabet Med.* 1998;15: 539-553.
2. Balkau B, Charles MA. Comment on the provisional report from the WHO consultation. European Group for the Study of Insulin Resistance (EGIR). *Diabetic Medicine: A Journal Of The British Diabetic Association.* 1999;16: 442-443.
3. Third Report of the National Cholesterol Education Program (NCEP) Expert Panel on Detection, Evaluation, and Treatment of High Blood Cholesterol in Adults (Adult Treatment Panel III) final report. *Circulation.* 2002;106: 3143-3421.
4. Einhorn D, Reaven GM, Cobin RH, Ford E, Ganda OP, Handelsman Y, et al. American College of Endocrinology position statement on the insulin resistance syndrome. *Endocrine Practice: Official Journal Of The American College Of Endocrinology And The American Association Of Clinical Endocrinologists.* 2003;9: 237-252.
5. Grundy SM, Hansen B, Smith SC, Jr., Cleeman JI, Kahn RA. Clinical management of metabolic syndrome: report of the American Heart Association/National Heart, Lung, and Blood Institute/American Diabetes Association conference on scientific issues related to management. *Circulation.* 2004;109: 551-556.
6. Alberti KG, Zimmet P, Shaw J. The metabolic syndrome--a new worldwide definition. *Lancet (London, England).* 2005;366: 1059-1062.
7. Grundy SM, Cleeman JI, Daniels SR, Donato KA, Eckel RH, Franklin BA, et al. Diagnosis and management of the metabolic syndrome: an American Heart Association/National Heart, Lung, and Blood Institute Scientific Statement. *Circulation.* 2005;112: 2735-2752.
8. Alberti KGMM, Eckel RH, Grundy SM, Zimmet PZ, Cleeman JI, Donato KA, et al. Harmonizing the metabolic syndrome: a joint interim statement of the International Diabetes Federation Task Force on Epidemiology and Prevention; National Heart, Lung, and Blood Institute; American Heart Association; World Heart Federation; International Atherosclerosis Society; and International Association for the Study of Obesity. *Circulation.* 2009;120: 1640-1645.
